# Supplementary material for: Deep sequencing and expression of microRNAs from early honeybee (Apis mellifera) embryos reveals a role in regulating early embryonic patterning
Source: PubMed Central journal article supplement (PMC3562263; doi:10.1186/1471-2148-12-211), 2012-11-02

Group16.4

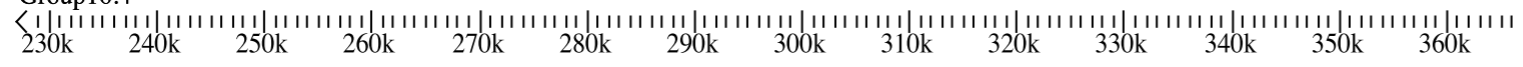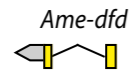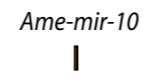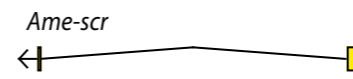

Supplement: 1471-2148-12-211-S2.pdf [file 1471-2148-12-211-S2.pdf]
