# Supplementary material for: Deep sequencing and expression of microRNAs from early honeybee (Apis mellifera) embryos reveals a role in regulating early embryonic patterning
Source: BMC Evol Biol. 2012 Nov 2;12:211. doi: 10.1186/1471-2148-12-211 (PMC3562263; doi:10.1186/1471-2148-12-211)
Supplement: Additional file 5 — Figure S7. Alignment of sequence reads to Apis mir-92a, mir-92b-1 and mir-0005/mir-92b pre-miRNAs. [file 1471-2148-12-211-S5.pdf]

[illegible][illegible]

|                                                                                                                                                                             |                              |
|-----------------------------------------------------------------------------------------------------------------------------------------------------------------------------|------------------------------|
| GGATACTGGCAGGTTGGGATGTGGGCATTATTTGTTGCCAAGGTTAGATCAAAATTGCACTCGTCCCGGCCTGCTGGATCTAGT                                                                                        | m0005_2263                   |
| (((((.(..((((((((( ((((. ((. (((. (. . . .) .))))) ))).). )))))))))))...<br>*****AGGTTGGGATGTGGGCATTATTTG*****<br>*****AAAAAAAAAAAAAAAAAAAAAAA AATTGCACTCGTCCCGGCCTGC ***** | m0005-5p 18<br>m0005-3p 2245 |
| -----AGGTTGGGATGTGGGCATTATT-----                                                                                                                                            | t0157426 1                   |
| -----AGGTTGGGATGTGGGCATTATTTG-----                                                                                                                                          | t0023023 16                  |
| -----AGGTTGGGATGTGGGCATTATTTGTT-----                                                                                                                                        | t0154308 1                   |
| -----AATTGCACTCGTCCCGGC-----                                                                                                                                                | t0057586 4                   |
| -----AATTGCACTCGTCCCGGCC-----                                                                                                                                               | t0076834 3                   |
| -----AATTGCACTCGTCCCGGCCT-----                                                                                                                                              | t0039423 7                   |
| -----AATTGCACTCGTCCCGGCCTG-----                                                                                                                                             | t0006032 109                 |
| -----AATTGCACTCGTCCCGGCCTGCT-----                                                                                                                                           | t0000602 2115                |
| -----ATTGCACTCGTCCCGGCCTG-----                                                                                                                                              | t0252919 1                   |
| -----ATTGCACTCGTCCCGGCCTGC-----                                                                                                                                             | t0364663 1                   |
| -----GCACTCGTCCCGGCCTGC-----                                                                                                                                                | t0063068 4                   |
| -----GCACTCGTCCCGGCCTGC-----                                                                                                                                                | t0339302 1                   |
